# Supplementary material for: A Joint Model Based on Post-Treatment Longitudinal Prognostic Nutritional Index to Predict Survival in Nasopharyngeal Carcinoma
Source: MDPI journal article supplement (doi:10.3390/cancers16051037), 2024-03-03
Supplement: s1 [file s1]

**Table S1.** Joint modelling analysis of longitudinal PNI data and distant metastasis-free survival (DMFS).

| Variable                      | Estimate (95% CI)       | SE    | p-value |
|-------------------------------|-------------------------|-------|---------|
| <b>Longitudinal sub-model</b> |                         |       |         |
| Intercept                     | 44.248 (41.739, 46.757) | 1.280 | <0.001  |
| Follow-up (years)             | -0.822 (-1.038, -0.606) | 0.110 | <0.001  |
| Age (years)                   | -0.131 (-0.154, -0.108) | 0.012 | <0.001  |
| Male                          | 0.540 (-0.071, 1.150)   | 0.312 | 0.083   |
| DM                            | -2.242 (-3.587, -0.896) | 0.687 | 0.001   |
| HTN                           | 0.373 (-0.649, 1.395)   | 0.522 | 0.475   |
| BMI (kg/m <sup>2</sup> )      | 0.114 (0.050, 0.179)    | 0.033 | 0.001   |
| AJCC stage                    |                         |       |         |
| 1 & 2                         | Ref.                    |       |         |
| 3                             | -0.760 (-1.484, -0.035) | 0.370 | 0.040   |
| 4                             | -2.088 (-2.770, -1.406) | 0.348 | <0.001  |
| Treatment protocol            |                         |       |         |
| IMRT                          | Ref.                    |       |         |
| CCRT                          | 2.153 (0.833, 3.474)    | 0.674 | 0.001   |
| Induction C/T + CCRT          | 3.608 (2.174, 5.042)    | 0.732 | <0.001  |
| Variable                      | Hazard Ratio (95% CI)   | SE    | p-value |
| <b>Survival sub-model</b>     |                         |       |         |
| PNI                           | 1.051 (0.970, 1.138)    | 0.041 | 0.227   |
| Age (years)                   | 1.011 (0.988, 1.033)    | 0.011 | 0.350   |
| Male                          | 2.098 (1.063, 4.144)    | 0.347 | 0.033   |
| DM                            | 3.235 (1.116, 9.374)    | 0.543 | 0.031   |
| HTN                           | 0.381 (0.116, 1.246)    | 0.605 | 0.111   |
| BMI (kg/m <sup>2</sup> )      | 0.962 (0.904, 1.023)    | 0.031 | 0.211   |
| AJCC stage                    |                         |       |         |
| 1 & 2                         | Ref.                    |       |         |
| 3                             | 6.731 (1.841, 24.611)   | 0.662 | 0.004   |
| 4                             | 12.958 (3.646, 46.052)  | 0.647 | <0.001  |
| Treatment protocol            |                         |       |         |
| IMRT                          | Ref.                    |       |         |
| CCRT                          | 0.758 (0.235, 2.442)    | 0.597 | 0.642   |
| Induction C/T + CCRT          | 0.532 (0.137, 2.060)    | 0.691 | 0.361   |

PNI = prognostic nutritional index; SE = standard errors; DM = diabetes mellitus; HTN = hypertension; BMI = body mass index; AJCC = *American Joint Committee on Cancer Staging Manual, 7<sup>th</sup> & 8<sup>th</sup> Edition*; IMRT = intensity-modulated radiotherapy; CCRT = concurrent chemoradiotherapy; C/T = chemotherapy.

**Table S2.** Joint modelling analysis of longitudinal PNI data and local–regional recurrence-free survival (LRRFS)

| Variable                      | Estimate (95% CI)       | SE    | p-value |
|-------------------------------|-------------------------|-------|---------|
| <b>Longitudinal sub-model</b> |                         |       |         |
| Intercept                     | 43.699 (41.165, 46.233) | 1.293 | <0.001  |
| Follow-up (years)             | -1.110 (-1.342, -0.878) | 0.118 | <0.001  |
| Age (years)                   | -0.125 (-0.148, -0.102) | 0.012 | <0.001  |
| Male                          | 0.606 (-0.011, 1.223)   | 0.315 | 0.054   |
| DM                            | -2.392 (-3.749, -1.035) | 0.692 | 0.001   |
| HTN                           | 0.352 (-0.687, 1.390)   | 0.530 | 0.507   |
| BMI (kg/m2)                   | 0.128 (0.062, 0.194)    | 0.034 | <0.001  |
| AJCC stage                    |                         |       |         |
| 1 & 2                         | Ref.                    |       |         |
| 3                             | -0.702 (-1.434, 0.030)  | 0.374 | 0.060   |
| 4                             | -1.926 (-2.615, -1.236) | 0.352 | <0.001  |
| Treatment protocol            |                         |       |         |
| IMRT                          | Ref.                    |       |         |
| CCRT                          | 2.029 (0.687, 3.370)    | 0.684 | 0.003   |
| Induction C/T + CCRT          | 3.529 (2.074, 4.984)    | 0.742 | <0.001  |
| Variable                      | Hazard Ratio (95% CI)   | SE    | p-value |
| <b>Survival sub-model</b>     |                         |       |         |
| PNI                           | 1.040 (0.956, 1.130)    | 0.043 | 0.363   |
| Age (years)                   | 1.018 (0.992, 1.045)    | 0.013 | 0.181   |
| Male                          | 2.151 (0.985, 4.697)    | 0.398 | 0.055   |
| DM                            | 0.603 (0.133, 2.733)    | 0.771 | 0.511   |
| HTN                           | 2.208 (0.940, 5.188)    | 0.436 | 0.069   |
| BMI (kg/m2)                   | 0.962 (0.892, 1.037)    | 0.038 | 0.308   |
| AJCC stage                    |                         |       |         |
| 1 & 2                         | Ref.                    |       |         |
| 3                             | 1.364 (0.666, 2.794)    | 0.366 | 0.396   |
| 4                             | 0.960 (0.455, 2.029)    | 0.382 | 0.916   |
| Treatment protocol            |                         |       |         |
| IMRT                          | Ref.                    |       |         |
| CCRT                          | 1.077 (0.231, 5.014)    | 0.785 | 0.925   |
| Induction C/T + CCRT          | 0.816 (0.146, 4.554)    | 0.877 | 0.817   |

PNI = prognostic nutritional index; SE = standard errors; DM = diabetes mellitus; HTN = hypertension; BMI = body mass index; AJCC = *American Joint Committee on Cancer Staging Manual, 7<sup>th</sup> & 8<sup>th</sup> Edition*; IMRT = intensity-modulated radiotherapy; CCRT = concurrent chemoradiotherapy; C/T = chemotherapy.
